# Supplementary material
Source: publisher figshare collection journal article supplement (https://frontiersin.figshare.com/ndownloader/files/13663361)
Supplement: Supplementary file [file 13663361]

## *Supplementary Data*

### **Supplementary data 1:** gDNA length of bilocular (6373 bp)

GTGTGTGGCCATTGATAGACTAGCTATGTCAAAGTAGCTTAGAACTTTCAGAAATTCTAACTAACGACAGAT  
TTTTTTCTTACAAAGATCTAAGTGTGATATTCGAGAGTTTCCACTACGATTTTATTTATGATTAGCCACTGTTA  
ACAACCAAACTGTAAGAATATTCGAAAATTTCCACATATTCGGAAGTTAACTCGAGCTTGTAATCAAATCA  
ACGATTTTCAGAAGGTAAAAACACCATAATCTTAGCAAAAAACAAAAACATACTTTTAAATGTCACA  
AGAGAGAAGATAAGGGTAAAGTCAGACAGTTTTTGCAAAACCAAAGGTAAATAACATAGAACGTGGGGACC  
CTGAAGCAGAGCAGAAGAAGGTCTACAAGAAGAGTGAGTGTAGACAAAGACAAGAAAAGGAGCGTTGAC  
TATTAGATGGAAGCCAAAATAGAAGGGGCAGATTTGTCTCTTTTGAAAGGACACAGACAACTTTCTCTAC  
GGGCCATTTAATAACTAGGCCCTACTTAATAAGCCATTAACCTCCCTCTTTGTCTTTTAAAGTTTTAAATAC  
ATTTCCATTTTCTAATCACGTGACGATGAAAACAAATGTCGTCGGATTAACTGGTTGAGATGACAAGA  
GGGCGATAAAAAGAAAGAAACACAGCAGCTATAGCCAGGGAACGTAAAGTTAAGTCTGTCTATCGTCTAT  
AACGGTCAGTTCAGATCATAGACATTACTGTAGTAGCGTTTTCTTTCTCCGTTACATTTTAAACGCCGTGAA  
GATAGCCACTTATTTTGATATATATAGCCAAAAGATAAACTTTCTCGATTTAAATCGTGTGAGAAAGATTTAAC  
AGAGGAAAGAAGACGACGACGACGTTTTCCCGTTATCCATGTCTAGTGTAGTGGCGGCTACTAACCAATA  
ACTTTTGTATATAAACTGTAAAAAGACTATGATAAAAGTTTCTTTAAAGCACAATACAGTGGTGGATTTTTG  
GGTTTGCGGTTCAATTCCAGCAAATGTTATTTGAGCACTAAACGTTAGTTAGCCGAGAAAAAATCATAGATA  
TGTTTTAGAATTCACATGATTAAATGAAATTTGACACGAACTGATTTAAATATCGTAGTTTCAGGTTTAAAA  
TTTACTAGTAACTGTAATAATCAAAGAAAAATATTAGAAAAATCCATGTTTCGGAACCTCGGTAGGCACTAC  
GCGTGCGATCGGATAACGCCTAGCACCTAATCAATTAATCAACGATTACTCGGAAATTAATCGGTGATCTTATT  
TATGTTGTTTATAATATATCTCTATCATAAACCATAAAATTAGTGTGGTGCAATGGTAAGTGTCTTTTCATTTAAC  
ACATGATTCCGAGTTCAAGTGCTAGGATGTGCACTTTAATAGTTTTTATATTTTTCTTTAATGAAAGGTAAAA  
CCGTTATTTATATATCATCTTCCTATTTGGGTTTTTAGATCTCTGCAATTGTAAAAACGCGATGGCTAAGAAATT  
TTGACGGGTTCTAAACCAATTTTCTTTGTTTTCTTGTGTTTTTGTCAAAATTTACAAATTTAAAGTAGATTA  
TTAGATTTACAGGTTCAAATAAGTAAAAAATGTTGTTGTTTTTTTTGAATCTGATTTTCTAAGCGCATAGCT  
CCAATTCGCCACGTTGCTCACTGTATAGCGATTTCTCAGCCGCTAAATCAGCTAGGCGGTGCGATTTTAGAA  
CATGGGAAAAAATAGAATGCGAGATATAAAAGACAATGAACGATTGACACATGAATGTTGACTGCTAGTCG  
TAGTTCATATCTAGAAGCTGAATGTCCTTTTAACCATTTATACTTTATATCCGTATGATAATTCATAAATCTACC  
TCGATAGAGAGTAACCATCACAATTTTTTTTCCAGTAATTACGAGATTCATTGGAGAAAAAAAAGGGTTTTT  
AAAGCGCAATATTTCTAGTGGTATATTTATTTCTATTCAAGGTATATAAAAAAGATTAAGGCAATAATAT  
TCTCTCTGAAAGTCTAGAGGTATTTTAGAACAGTACTGCTACGAATCTCTTCTCATCTTCATAATATGCCATTG  
TGATTGTTTATATATATCTGTGCACTCATCTATCGCATAAACTCACGCTAACTTCTTATTCTCTCTCTCTCTCT  
TGAGAAGACAGCTTTGAAGAAAGAAAGAAAAAATGGAGATGAGACTTTTGAAAACACACCTTCTGTTTCT  
GCATCTTCACTACGTTATCTCGATTTTGCTTCTATGTTTCTCACCATGCTTCGTTCCACTGACATGGACCATCT  
CCTCAACCTCAAATCTCAATGACTGGTCACAACGGACAGGTCTCCACGACTGGGTTCACTCCACTTCTCCC  
ACGGCTCACTGTTCTTTCTCCGGCGTCTCATGCGACGCCGACGCTCGTGTTGTCTCACTCAACGTCTCTTTCA  
CTCCTCTGTTTCGGAACCATCTACCGGAGATTGGGATGTGAACCGTTTTGGTGAATCTGACGTTAGCCGCGA  
ATACTTCTCCGGTAGGTTGCCGCTGGAGATGAAGAGTCTCACTTCACTAAAGGTTCTCAACATCTCCAACA  
ACGTAAACCTCAACGGAACCTTCCCCGGAGAGATTCTCACTTCCATGGTCGACCTCGAAGTCTCGACGCCT  
ATAACAACAACTTCACTGGGCCGTTACCGCCGGAGATTCCCGGGCTGAACAAGCTCAAACCTCTCTCTCG  
GAGGAAACTTCTTACCAGGAGAGATTCCCAGAGTTACGGAGATATCAAAGCTTGGAGTATCTCGGCCTC

AACGGAGCCGGACTCTCCGGCGAATCTCCGGCGTTCTTGTCACGTCTCAAGAATCTCAGAGAAATGTACGTC  
GGCTACTTCAACAGCTACACCGGCGGCGTTCCGCCGGAGTTCGGCGAATTAACGAAGCTAGAAATCCTCGA  
CATGGCGAGCTGTACTCTCACCGGAGAGATTCCGACGACACTGAGTAATCTGAAACACTTGACACGCTGTT  
CCTCCACATCAACAACCTTAACCGGAAACATCCACCAGAACTCTCCGGTTTAATCAGCTTAAATCTCTCGAT  
CTATCAATTAACCAGCTAACCGGAGAGATTCTCAGAGCTTCATCTCTCTGGGAAACATCACTCTCATCAACC  
TCTTCAGAAACAACCTCCACGGGCCGATACCGGAGTTCATCGGAGAAATGCCGAACCTCCAAGTCTTCCAG  
GTGTGGGAGAAACAACCTTCACGTTAGAGTTACCGGCGAATATCGGCCGGAACGGGAATCTGAAAAAGCTCG  
ACGTCTCTGAAAACCATCTCACCGGACTCATCCCCGTGGATTTATGCAGAGGTGGGAAGCTGGAGGTTCTG  
GTACTCTCCAACAACCTTCTTCTCGGCTCCATCCCGGAGAAGCTAGGTCAATGCAAATCTCTAAACAAGATCA  
GAATCGTCAAGAATCTCCTCAACGGGACCGTTCGGCGGGGACTATTCAACTTACCACTCGTTACAATCATCGA  
GCTCGCGGATAACTTCTTCTCCGGGGAACCTTCTACGGAGATGTCCGGCGACGTTCTCGATCATATCTACCTA  
TCTAACAACTGGTTTACCGGTTTAATCCCTCCGGCTATCGGTAATTTCAAAAATCTACAGGATCTGTTCTTAGA  
CCGGAACCGGTTTAGCGGGAATATTCGAGAGAAGTTTTCGAGCTGAAGCATCTCACGAAGATCAACACGA  
GCGCTAACAACTAACCGGCGATATCCCTGACTCATTCTCGCGATGCACTTCCTTAATCTCCGTCGATCTCAGC  
CGTAACAGAATCGGCGGAGATATCCCGAAAGACATCCACGACGTGATTAAGTCTAGGAAGTCTCAATCTCTCC  
GGGAATCAGCTCACCGGCTCGATCCCGATCGGAATCGGGAAGATGACGAGCTTAACCACTCTCGATCTCTCC  
TTCAACGACCTCTCCGGGAGAGTACCACTCGGCGGTGAGTTCTAGTCTTCAACGACACTTCCTTCGCCGGA  
AACCTTACCTCTGCCTCCCTCACCACGCCTCTGCCTAACGCGTCCAGGACAAACCTCTGATCGCATCCACG  
CGGCGCTGTTCTCTCCGTCGAGGATCGTCATCACGATCATCGCGGCGATCACGGCGTTGATCCTCATCAGCGT  
CGCGATCCGTCAGATGAACAAGAAGAAACACGAGAGATCCCTCTCGTGGAAGCTAACCGCCTTCCAGCGAC  
TCGATTCAAGGCGGAAGACGTCCTCGAGTGCCTTCAAGAAGAGAACATAATCGGCAAAGGCGGAGCGGG  
GATCGTCTACCGCGGATCCATGCCGAACAACGTAGACGTCGCGATCAAACGGTTAGTTGGACGCGGAACGG  
GGAGGAGCGATCACGGATTACGGCGGAGATTACAGCGTTAGGAAGAATCCGCCACCGTCATATAGTGAGA  
CTACTCGGATACGTGGCGAACAAGGACACGAACCTGCTTCTATACGAGTACATGCCTAACGGGAGCCTCGGC  
GAGCTTTTGCACGGGTCTAAAGGCGGTCTCTTCACTGAGTGGGAGACGAGGCACAGAGTAGCCGTTGAAGCGG  
CGAAAGGACTGTGTTATCTTACCATGACTGTTTCGCCGTTGATCTTGACAGAGACGTTAAGTCCAATAACAT  
TCTCCTGGACTCTGATTTTCAAGCCCATGTTGCTGATTTTGGGCTTGCTAAGTCTTAGTGAGCGGTGCTGCT  
TCTGAGTGTATGTCCTCAATAGCTGGCTCCTACGGTTACATCGCTCCAGGTTAGTTTAAACGTGTTTTATATAA  
CAAACATATGCCATGTTCTTTAAATGTTACTGAGACTAATCATATGTTAGAGTTTGTTGTCCGTTTTATTGTCGTA  
TAGCTGATTACTATGATTTGTGACACACAAATGAATGTGACTTTAACAATAAAATATGTACTAATCATTGTTTG  
TTTTGGGTTTGATAGATATGCATACACTCTCAAAGTAGACGAGAAGAGTGATGTGTATAGCTTTGGAGTGG  
TCTTGTTGGAGCTGATAGCTGGGAAGAAACCGGTTGGTGAGTTTGGGAAGGAGTGGATATAGTGAGGTG  
GGTGAGGAACACGGAGGGTGAGATACCTCAGCCTTCGGATGCAGCTACTGTTGTTGCGATCGTTGACCCGA  
GGTTGACTGTTACCCGTTGACCAAGTGATGTTTCAAGATAGCGATGATGTGTGTGGAGGATGAGG  
CCGCGTCAAGGCCTACGATGAGGGAAGTTGTGCACATGCTAACTAATCTCCTAAGTCCGTGACTAACTTGA  
TCGCCTTCTGAGTTCTGACCCAATCAAAGGCTAATGAAAAAATAAGATTGTGTTGTGTGAATGATAATATTTT  
TGTTTTTTTAAAGTGACATATATCGTTTTAAATTATTGCCGAGTTGTATGTATATTTGCTGTGTGTTGGATCTGTA  
TATCGCCTCTTATGTGTTTGTTATCTACTCTTAAGTCTGTAATGAGATTCTTATGCTTATTGATGATGGCTTTTAA  
ATTTAGCTATTTCTTCTTTCAGACAAAGTTGCGTAAGTAATGAAAAGAGATAAAAAACCAAGAAGCATATGTT  
CATTACAAGCAGACTCATCATTTGTATTATCAACAAGAGCAGACAAACATGTGTCTTAGATCAAAGATGATGA  
TGATGATCTGGAGCCAATCAAATGAGATCCACTCCACTTTTTCTCTCACAACAATTTATCTGCTAGATTC  
TACCAATATCCAACCTCGAAATCTAAATATAGATTCACATGTTTATTATGGTAATAGACCCAAGATCCTCCATTAC  
AATGTGGGATGTTCTCTACACCAACAAGCCCATACAAATTACACTCAAATCCTTTAACACAGCTCTTAAATT  
CAAAATCATTTTTTATCAAAAAAAAAAAAAACAAGAACATTATTCATCATCGCTATAACACTAAAAAAGAAAC

ACAGACATAATTTTCATAGCTACAATAAATAACACCAATGACTAATTCCTCAATAGCTGTTATATACTTAGAAAAG  
CACCGTAAGGTATGTGTTGAGGAAGCGTGAATCGAACCTGCGAAGCTGGTAACCGAACCGCAACGCCGTG  
CCAGCAAATCCCTCCTTTACAAATTCACCACCTTGGTGATGCTGAAGGTGACTAAGATTCTCAACGCCTACG  
CGATTGTACCGCGAAACCGCATCCGCCGCCCTGCGAGTCACGTCCCAAGCCAGCGTGACCGCAAGCAAAAC  
TCCGACCGTCGTAATCGAAACTACAACGACGAATCCA

**Supplementary data 2:** Insertion sequence in multilocular (4961bp)

TGAGAACAAGAGGAGACAGAGAGAATTTAATAAACTTCCTTTTGATTCACTTTCTCAAAACGTTTCTTTA  
CAAGATAATCGAGTATATATACAACCTCAAGATAAACCTAGTTCCTTAACTTTGGACCACTCAACACGTGTC  
TTCGTACACACACTCTACACCTTGCAAGGCATCGTAACGGCTAGACAAAGCTATTCCACAGTTTACTCCAGC  
TGGTGCAATTTGTCTTGTCTGTACTTGTACGAACTCTTCATTACTCTGTTTCAGAGTTTGTCTTTGGGCCA  
GCATACTTCCTTCAGTTAATGGACCAGTCGCTGATATACCAAGGCCCATCATGGCTTGTCTTACTGTCATCCCC  
CGCAAACCTGATGATGGGTGGAGCACCAACACTCAGTTTGGCTCTGAGACTCTGAAAGGAATGGCGTGGGA  
GAGATTTAGTGAAGATATCTGCAAGTTGCAGTGCAGAAGGAATGTGCTGAACCTCCAAGACACCAAGAGCC  
ACCCGCTCCCTAACATAATGGTAATCCGTTTCAATATGTTTGGACCGACCGTGAAGAACCGGGTTTGTCTGTA  
GATAAACTGCAGAGAGGTTATCACAGTGAAGAACAGCCGGCTTTGGTTGTTTGATCTTCATATCACGCATCA  
CAAACGAAATCCATGTTAACTCAGTCCGTCTTGCAAGCTCGATATTCAGCCTCAGTGGACGACCGCGAGAC  
AGTCGGTTGGCGCTTTGCCGACCAGGAGACAATGTTAGAACCAATCATGACACAAAAACCACAGTCGACC  
GTCTTGTCTCCCTACACCCTGCCAGTCACTATCACTATACGCGACAACATCCAAACCAGAGTTCTTACGGAA  
GTAAATCCCATGGATGAAGTACCACGAAGGTAGCGAAGAACCCGCTTCAACAAATGAAAGTCAGCTTCAG  
TGGGAGAATGCATTCTCTGACAAATGAAATTCACAGCAAATGAATGTCGGGTCGAGTGATAGTGAGATACT  
GTAACCTCCAGCAAGACTCCGAAAGTAGCTAGGCTCAGGGAACGGCCGAGTATCTTCATAAACTTGATCGA  
GTCGCAAAGGGAGAGGTGTATGAACAGGATTACACGCAGACATATTGGCATGGTGAAGAATCTCTTCAGTG  
TACTTGGATTGAGAGAGGAAAAGACCAGAATCTGTAATCTGAGCCTGAACGCCCAAGAAGTAGTGAGATT  
ACCCAAATCTTTCATGGAGAATCGGCTACTGAGCTCAGTGATAAGGGACTTGAACAAGGATGGATTTGAGC  
CAGTGAGAAGTATATCATCCACATAAAGGAGGAGAACTAATGTGTCGCCATTGTGATGATAAACAAAGAGAG  
AGGGATCAGCTTTACTGCAGACAAAGCCATACTCAAGAAGGAAGTTACTAAATTTATCAAACCAAGCCCCTG  
GAGCTTGTTTTAAACCGTACAGAGCCTTCTTGAGAGAGCACACATGATGAGGTTTAGTGCAATCTTCAAAGC  
CGGGTGGTTGTATCATATAGACTGCTTCTTGAAGATCTCCATGAAGGAAAGCATTTTTAACATCAAGCTGAGT  
GATGTTCCAGTTCTTTGAAGCAGCTACAGCAAGAAGTATCCGAATGGTAGAAGTCTTAACCACTGGACTGTA  
TGTCTCTGTGAAATCTACTCCTTCTTCTTGATCAAACCCCTTAGCAACTAACCGCGCTTTAAGTTTATTGACTG  
TCCCATCTGCGTTAAGCTTCACTGTAAAAACCCATCTGCAACCAAGAACATTCATAGTTTCTGTAGCTTCCGTT  
AAAACCCAAGTGTGGTTCTGATAAATCGAGTCTAGTTCATCCAACATTGCTTGACGCCATCCAGGGTGCGCC  
AAAGCTTCAGATATAGTCTGTGGTAAGGAGGGAATCGTCTTGCTTGAGACCAGAGCGTAACGTGGATTAGG  
TTTGCTAATACCAGCTCGTGATCTCGTCATCATAGGATGACTAGGCGCTGCTACGTCTGGTGAGGCACGAGG  
AGGTGATTGAGCAACCTCAGGAAGACTTGTGGTGGATACGTGCGCTTCAGACAGCTCGAAGTCTTCTGCC  
CATGATCAGAACGAGATGGGGTTGCAATAGGCGTATCTTGACCCGTGGTGATAGGAGTATCCTGTTGAGGAT  
ACTCTGTAACCTGAGGACACTCTGTAACCTGAGAAGGTACTGTAGGCAGATAGACCGGAGGAGCTTCAAAT  
GCAGTACCATCTTGCCAAGCTTTAAGCAAACCAGAGTTGTGTTTCACAAGCAGATGTTTATACTGTCCAGTG  
AATGGGAAGGTCTGCTCATCGAAGATAACGTGGCGAGAGATGTAAACTCGACCTGTTGGTGGATGCAAACA  
CCTGTAACCTTTGACTGAGGATGATAACCGAGGAAGACACACTGTAAGGATCGGGGCTCGAACTTGTGTT  
GAGCATAGGGACGCAAGCACGGATAGCACGCAGAGCCAAAGATTCTGAGAAATGAGTAGTCTGGTGCTTT  
ACTAGAGAGAACCTCTGAAGGGCTTTTGTGTTGAGAACAGAAGAAGGGATCATGTTGCTGATGAAGTTAG  
CAGAGTAGAAGGCCTCAACCAATATTTAAGAGGAGTGTGACTTTGAAATAACATAGAAAGACCCAATTAG

TAAGATGTCTATGTTTTCTCTCAGCAATACCATTTTGTGAGGAGTTGAAGGACATGAAACAAGATGAACAAT  
CCCTTGATCTCTGAGATGATTGCGAAACCTTGCTCATAAACTCACCACCCCCATCGCTCTGAAAGACTTTC  
AGTTTTCTGTAAACTGATTTTCGATTTGTTTTGAAAGACAATGAACACATCACAAAAATCAGACTTGGCTT  
TAAGAGGTATTATCCATGAGTAGCGACTAAAGTTGTCAACAAAGACTGCATAATACTTGAACCCTTGAAGTGA  
TACAACCGGAGAAGGACCCACAGATCACAATGTATCCGATCTATGGGTTCTTGACACTAGACTCTGAAATA  
AAAAAAGGAAGCTGACTGCTCTTCCCATCTGGCAAGGTCCACAAACGGGAGAAATGCTGCTCTTATTGACT  
ATGATTGCCTTGCTTTGCTTGAGGAGCTGAAGAATCTGGAAGTTCGCGTGCCCAAGTCGCTGATGCCACACC  
ATATCACTAGCTGCACACTGACGATTGGAGAAGTAAGCCGCAAACCTCCTTCTCTCCAGCACATACAAGCCTC  
TATTTGAGTTCCCTTTGTCAACACCTTCTGAGCATCGAGGTGATGACATAGACAGCATTAGAGTCAAAGAA  
CACCCACAGGGGTAAATCATCACACAGTTTGGATACAGATAATAGTGATTTTGCATTGAAGGACAGACAAG  
AACATCGTTTAGAGGAAGGCTACCTGTCTCAGTGGTGAGCGTTGTGGAACCAACGTGGGTAATCGGAAGG  
AAATTGCCATCTGCCACCATAACATGCTCAGAACCATTGTATGGAGTAGTGTTCTGCATCTGAGTTGTATTAGG  
AACCATGTGAGCAGTGGCACCTGAGTCAGCTATCCATCCCTGCCACTAGGATCAGAGACTGGAAAAGCGG  
ACAGAGCATGAGGAACATCGTCACTCTGATAAGAGTTATCAAAGCGGTTCCAGCAACGAAGAGCGGAGTG  
GCCGGTGCGGCCACAGATCTGACACACAGGGCGAGAGTTGTTGTTGTTATTGCCACCACCAGAGTTGCTGA  
CTTGTTGAGTGAAACCTCTTCCACGAGTTGAGAAGCCACCACGACGAGAATAGCCACCGCGACCACGAGAA  
TAATTATTGCTTCGCTCTCTGTTGAGTTGTTGTAGTACCCTCGGTGAGTCTGGAAAGCCATGTTGGGAGTAA  
CATCTGATGTTGCTTCATACGACTGAAGACGAGCGTCAAAACCAGAGACATCAGAAATCACATCGTTCAAAG  
TCGGAGGAGGGATTGAGTCATGGAGCTCTGAACGACAGTGATAATTGGATCATATTCTCTTCCAAGGCCAT  
TGATAAATGAGAAGATCTTCATGGATTCTCTATAGGCTTCCAATGGAGCTCAACTTGTCAAAATGGCTCG  
AAACTCACGACAGTAGGTAGTAAAGTCTTACCTTTCTTAGTCATCAACTGGAGAGACCGTCTGAGCTCAA  
CTCACGAGCAATAGAACTCTTGTTGTAGTTGTGAGCTAACGATAACCAGACATCACGAGATGTAGATAGACCA  
TGTAATGTACCAAGGACTTCTCAGTAAGTGTTCAAAGATCCAAGAAATGACGAGTTGATCCGTACAAGTC  
CAAGCTTCAAAGCGAGGATTTGGGGCTTGAACGTTGACGTTGTCGACCACGGTTGTGACTAGCTCCGGCG  
GAGGTGGAATCTGACCAGTAGCAAAGCCCAACAGCTTCTGACTGCGAAGAAGAGACTCCATTTGAGTCTTC  
CATAGGAGATAGTTGCTGTCACTCAGTTTAAATGGTAACAGAACTTGTAATGTGAACACTGGTGGGAAAAGG  
GTATGGATCTTGCTCAGCCATGACAGCACCTGTAGGGTTAAATGAGCTCTGATACCATGAGAACAAGAGGA  
GACAGAGAGAATTTTAAATAAACTTCTTTTGTATTCACTTTCTCAAAACGTTTCTTTACAAGATAATCGAGTA  
TATATACAACCTCAAGATAAACCTAGTTCCCTTAACTTTGGACCACTCAACACGTGTCTTCGTCACACACACT  
CTACACCTTGCAAGGCATCGTAACGGCTAGACAAAGCTATTCCACAGTTTACTCCAGCTGGTGCATTTGTCTT  
CTTGTTCTGTACTTGTACGAACTCTTCACTACTCTGTTTCAGAGTTTGTCTTTGGGCCAGCATACTTCCTTCAG  
TTAATGGACCAGTCGCTGATATACCAAGGCCCATCATGGCTTGTTACTGTCATCGGC

**Supplementary data 3:** gDNA length of multilocus (11334 bp)

GTGTGTGGCCATTGATAGACTAGCTATGTCAAAGTAGCTTAGAACTTTCAGAAATTCTAACTAACGACAGAT  
TTTTTTTCTTACAAAGATCTAAGTGTGATATTCGAGAGTTTCCACTACGATTTTATTTATGATTAGCCACTGTTA  
ACAACCAAACTGTAAGAATATTGAAAATTTCCACATATTCCGAAGTAACTCGAGCTTGTAAATCAAATCA  
ACGATTTTCAGAAGGTAAAAACACCATAATCTTAGCAAAAAAAAAACAAAAACATACTTTTAAATGTCACA  
AGAGAGAAGATAAGGGTAAAGTCAGACAGTTTTGCAAAACCAAAGGTAAATAACATAGAACGTGGGGACC  
CTGAAGCAGAGCAGAAGAAGGTCTACAAGAAGAGTGAGTGATAGACAAAGACAAGAAAAGGAGCGTTGAC  
TATTAGATGGAAGCCAAAATAGAAGGGGCAGATTGTCTCTTTTGAAAAGGACACAGACAACTTTCTCTAC  
GGGCCATTTAATAACTAGGCCCTACTTAATAAGCCATTAACCTCCCTCTTTGTCTTTTAAAGTTTTTAAATAC  
ATTTCCATTTTCTAATCACGTGACGATGAAAACAAATGTCGTGCGGATTAACTGGTTGAGATGACAAGA  
GGGCGATAAAAAGAAAGAAACACAGCAGCTATAGCCAGGGAACGTAAAGTTAAGTCCTGTCTATCGTCTAT

AACGGTCAGTTCAGATCATAGACATTACTGTAGTAGCGTTTTCTTTCTCCGTTACATTTTAAACGCCGTGAA  
GATAGCCACTTATTTTGATATATATAGCCAAAAAGATAAACTTTCTCGATTAAATCGTGTCAGAAAGATTAAAC  
AGAGGAAAGAAGACGACGACGACGTTTCCCGTTATCCATGTCTAGTGTAGTGGCGGCTACTAACCAAATA  
ACTTTTGTATATAAACTGTAAAAAGACTATGATAAAAGTTTCTTTAAAGCACAATACAGTGGTGGATTTTG  
GGTTTGCGGTTCAATTCCAGCAAATGTTATTTGAGCACTAAACGTTAGTTAGCCGAGAAAAAATCATAGATA  
TGGTTTAGAATTCACATGATTAAATGAAATTTGACACGAACTGATTTAAATATCGTAGTTTCAGGTTTAAAA  
TTTACTAGTAACTGTAATAATTCAAAGAAAAATATTAGAAAAATCCATGTTTCGGAACTCGGTAGGCACTAC  
GCGTGCGATCGGATAACGCCTAGCACCTAATCAATTAATCAACGATTACTCGGAAATTAATCGGTGATCTTATT  
TATGTTGTTTATAATATATCTCTATCATAAACCATAAAAATTAGTGTGGTGCAATGGTAAGTGTCTTTCATTAAC  
ACATGATTCCGAGTTCAAGTGCTAGGATGTGCACTTAATAGTTTTTATATTTTTCTTTAATGAAAGGTAAAA  
CCGTTATTTATATATCATCTTCTATTTGGGTTTTAGATCTCTGCAATTGTAAAAACGCGATGGCTAAGAAATT  
TTGACGGGTTCTAAACCAATTTTCTTTGTTTTCTTGTGTTTTGTCAAAATTCACAAATTTAAAGTAGATTA  
TTAGATTACAGGTTCAAATAAGTAAAAATGTTGTTGTTTTTTTTGAATCTGATTTTCTAAGCGCATAGCT  
CCAATTCGCCACGGTTGCTCACTGTATAGCGATTTCTCAGCCGCTAAATCAGCTAGGCGGTGCGATTTTAGAA  
CATGGGAAAAAATAGAATGCGAGATATAAAAGACAATGAACGATTGACACATGAATGTTGACTGCTAGTCG  
TAGTTCATATCTAGAAGCTGAATGTCCTTTTAACCATTTATACTTTATATCCGTATGATAATTCATAAATCTACC  
TCGATAGAGAGTAACCATCACAATTTTTTTCCAGTAATTACGAGATTCATTGGAGAAAAAAAAGGGTTTTT  
AAAGCGCAATATTTCTAGTGGTATATTTATCTCATTCAAGGTCATATAAAAAAGATTAAAAAAGCAATAATAT  
TCTCTCTGAAAGTCTAGAGGTATTTAGAACAGTACTGCTACGAATCTCTTCTCATCTTCATAATATGCCATTG  
TGATTGTTTCATATATATCTGTGCACTCATCCTATCGCATAAACTCACGCTAACTTCTTATTCTCTCTCTTTCTC  
TGAGAAGACAGCTTTGAAGAAAGAAAGAAAAATGGAGATGAGACTTTTGAAAACACACCTTCTGTTTCT  
GCATCTTCACTACGTTATCTCGATTTTGCTTCTATGTTTCTCACCATGCTTCGCTTCCACTGACATGGACCATCT  
CCTCAACCTCAAATCCTCAATGACTGGTCACAACGGACACGGTCTCCACGACTGGGTTCACTCCACTTCTCCC  
ACGGCTCACTGTTCTTTCTCCGGCGTCTCATGCGACGCCGACGCTCGTGTGCTCACTCAACGTCTCTTTCA  
CTCCTCTGTTTCGGAACCATCTCACCGGAGATTGGGATGCTGAACCGTTTGGTGAATCTGACGTTAGCCGCGA  
ATAACTTCTCCGGTAGGTTGCCGCTGGAGATGAAGAGTCTCACTTCACTAAAGGTTCTCAACATCTCCAACA  
ACGTAAACCTCAACGGAACCTTCCCCGGAGAGATTCTCACTTCCATGGTCGACCTCGAAGTCTCGACGCCT  
ATAACAACAACCTTCACTGGGCCGTTACCGCCGAGATTCCCGGGCTGAACAAGCTCAAACACCTCTCTCTCG  
GAGGAAACTTCTTACCAGGAGAGATTCCCGAGAGTTACGGAGATATCAAAGCTTGGAGTATCTCGGCCTC  
AACGGAGCCGACTCTCCGGCGAATCTCCGGCGTCTTGTACGTCTCAAGAATCTCAGAGAAATGTACGTC  
GGCTACTTCAACAGCTACACCGGCGGCGTTCCGCCGAGTTCCGGCGAATTAACGAAGCTAGAAATCCTCGA  
CATGGCGAGCTGTACTCTCACCGGAGAGATTCCGACGACACTGAGTAATCTGAAACACTTGCACACGCTGTT  
CCTCCACATCAACAACCTTAACCGGAAACATCCCACCAGAACTCTCCGGTTTAATCAGCTTAAATCTCTCGAT  
CTATCAATTAACCAGCTAACCGGAGAGATTCTCAGAGCTTCATCTCTCTGGGAAACATCACTCTCATCAACC  
TCTTCAGAAACAACCTCCACGGGCCGATACCGGAGTTCATCGGAGAAATGCCGAACCTCCAAGTCTTCCAG  
GTGTGGGAGAACAACTTCACGTTAGAGTTACCGGCGAATATCGGCCGGAACGGGAATCTGAAAAAGCTCG  
ACGTCTCTGAAAACCATCTCACCGGACTCATCCCGTGGAATTTATGCAGAGGTGGGAAGCTGGAGGTTCTG  
GTACTCTCAACAACCTTCTTCTCGGCTCCATCCCGGAGAAGCTAGGTCAATGCAAATCTCTAAACAAGATCA  
GAATCGTCAAGAATCTCCTCAACGGGACCGTTCCGGCGGGACTATTCAACTTACCACTCGTTACAATCATCGA  
GCTCGCGGATAACTTCTTCTCCGGGGAACCTTCTACGGAGATGTCCGGCGACGTTCTCGATCATATCTACCTA  
TCTAACAACCTGGTTTACCGGTTAATCCCTCCGGCTATCGGTAATTTCAAAAATCTACAGGATCTGTTCTTAGA  
CCGGAACCGGTTTAGCGGGAATATCCGAGAGAAGTTTTCGAGCTGAAGCATCTCACGAAGATCAACACGA  
GCGCTAACAACCTAACCGGCGATATCCCTGACTCATTCTCGCGATGCACTTCTTAATCTCCGTCGATCTCAGC  
CGTAACAGAATCGGCGGAGATATCCCGAAAGACATCCACGACGTGATTAACCTAGGAACTCTCAATCTCTCC

GGGAATCAGCTACCGGCTCGATCCCGATCGGAATCGGGAAGATGACGAGCTTAACCACTCTCGATCTCTCC  
TTCAACGACCTCTCCGGGAGAGTACCACTCGGCGGTCTAGTTCTTAGTCTTCAACGACACTTCCTTCGCCGGA  
AACCCTTACCTCTGCCTCCCTCACCACGCCTCTGCCTAACGCGTCCAGGACAAACCTCTGATCGCATCCACG  
CGGCGCTGTTCTCTCCGTCGAGGATCGTCATCACGATCATCGCGGCGATCACGGCGTTGATCCTCATCAGCGT  
CGCGATCCGTCAGATGAACAAGAAGAAACACGAGAGATCCCTCTCGTGGAAGCTAACCGCCTTCCAGCGAC  
TCGATTCAAGGCGGAAGACGTCCTCGAGTGCCTTCAAGAAGAGAACATAATCGGCAAAGGCGGAGCGGG  
GATCGTCTACCGCGGATCCATGCCGAACAACGTAGACGTCGCGATCAAACGGTTAGTTGGACGCGGAACGG  
GGAGGAGCGATCACGGATTCACGGCGGAGATTAGACGTTAGGAAGAATCCGCCACCGTCATATAGTGAGA  
CTACTCGGATACGTGGCGAACAAAGGACACGAACCTGCTTCTATACGAGTACATGCCTAACGGGAGCCTCGG  
CTGAGAACAAGAGGAGACAGAGAGAATTTAATAAACTTCTTTTGTATTCACTTTCTCAAAACGTTTCTTT  
ACAAGATAATCGAGTATATATAACCTCAAGATAAACCTAGTTCCCTTAACTTTGGACCACTCAACACGTGT  
CTTCGTACACACACTCTACACCTTGCAAGGCATCGTAACGGCTAGACAAAGCTATTCCACAGTTTACTCCAG  
CTGGTGCATTTGCTTCTTGTCTGTACTTGTACGAACTCTTCATTACTCTGTTTCAGAGTTTGTCTTTGGGCC  
AGCATACTTCCTTCAGTTAATGGACCAGTCGCTGATATACCAAGGCCCATCATGGCTTGTTTACTGTCATCCCC  
CCGCAAACCTGATGATGGGTGGAGCACCAACACTCAGTTTGGCTCTGAGACTCTGAAAGGAATGGCGTGGG  
AGAGATTTAGTGAAGATATCTGCAAGTTGCAGTGCAGAAGGAATGTGCTGAACCTCCAAGACCAAGAGC  
CACCCGCTCCCTAACATAATGGTAATCCGTTTCAATATGTTTGGACCGACCGTGAAGAACCGGGTTTGCTGTA  
AGATAAACTGCAGAGAGTTATCACAGTGAAGAACAGCCGGCTTTGTTGTTTGATCTTCATATCACGCATC  
ACAAACGAAATCCATGTTAACTCAGTCCGTCTTGACAGAGCTCGATATTCAGCCTCAGTGGACGACCGCGAGA  
CAGTCGGTTGGCGCTTTGCCGACCAGGAGACAATGTTAGAACCAATCATGACACAAAAACCACAGTCGAC  
CGTCTTGTCTCCCTACACCCTGCCAGTCACTATCACTATACGCGACAACATCCAAACCAGAGTTCTTACGGA  
AGTAAATCCCATGGATGAAGTACCACGAAGGTAGCGAAGAACCCGCTTCAACAAATGAAAGTCAGTTCA  
GTGGGAGAATGCATTCTCTGACAAATGAAATTCACAGCAAACCTGAATGTGCGGTCTGAGTGATAGTGAGATA  
CTGTAACCTCCCAGCAAGACTCCGAAAGTAGCTAGGCTCAGGGAACGGCCGAGTATCTTCATAAACTTGATC  
GAGTCGCAAAGGGAGAGGTGTATGAACAGGATTACACGCAGACATATTGGCATGGTGAAGAATCTCTTCAG  
TGTAATTGGATTGAGAGAGGAAAAGACCAGAATCTGTAATCTGAGCCTGAACGCCCAAGAAGTAGTGAGATA  
TTACCCAAATCTTTCATGGAGAATCGGCTACTGAGCTCAGTGATAAGGGACTTGAACAAGGATGGATTTGAG  
CCAGTGAGAAGTATATCATCCACATAAAGGAGGAGAACTAATGTGTCGCCATTGTGATGATAAACAAAGAGA  
GAGGGATCAGCTTTACTGCAGACAAAGCCATACTCAAGAAGGAAGTTACTAAATTTATCAAACCAAGCCCGT  
GGAGCTTGTTTTAAACCGTACAGAGCCTTCTTGAGAGAGCACACATGATGAGGTTTGTGCAATCTTCAAAG  
CCGGGTGGTTGTATCATATAGACTGCTTCTGAAGATCTCCATGAAGGAAAGCATTTTAACATCAAGCTGAG  
TGATGTTCCAGTTCTTTGAAGCAGCTACAGCAAGAACTATCCGAATGGTAGAAGTCCTAACCACTGGACTGT  
ATGTCTCTGTGAAATCTACTCCTTCTTCTGATCAAACCCCTTAGCAACTAACCGCGCTTAAAGTTTATTGACT  
GTCCCATCTGCGTTAAGCTTCACTGTAAAAACCATCTGCAACCAAGAACATTATAGTTTCTGTAGCTTCCG  
TAAAACCCAAGTGTGGTTCTGATAAATCGAGTCTAGTTTCATCCAACATTGCTTGACGCCATCCAGGGTGCGC  
CAAAGCTTCAGATATAGTCTGTGGTAAGGAGGGAATCGTCTTGCTTGAGACCAGAGCGTAACGTGGATTAG  
GTTTGCTAATACCAGCTCGTGATCTCGTCATCATAGGATGACTAGGCGCTGCTACGTCTGGTGAGGCACGAG  
GAGGTGATTGAGCAACCTCAGGAAGACTTGTGGTGGATACGTCGCCCTCAGACAGCTCGAAGTCTTCTGC  
CCATGATCAGAACGAGATGGGGTTGCAATAGGCGTATCTTGACCCGTGGTGATAGGAGTATCCTGTTGAGGA  
TACTCTGTAACCTTGAGGACACTCTGTAACCTTGAGAAGGTAAGTGTAGGCAGATAGACCGGAGGAGCTTCAAAT  
GCAGTACCATCTTGCCAAGCTTTAAGCAAACAGAGTTGTGTTTCACAAGCAGATGTTTATACTGTCCAGTG  
AATGGGAAGGTCTGCTCATCGAAGATAACGTGGCGAGAGATGTAACTCGACCTGTTGGTGGATGCAAACA  
CCTGTAACCTTTGACTGAGGATGATAACCGAGGAAGACACACTGTAAGGATCGGGGCTCGAACCTTGTT  
GAGCATAGGGACGCAAGCACGGATAGCACGCAGAGCCAAAGATTCTGAGAAATGAGTAGTCTGGTGCTTT

ACTAGAGAGAACCTCTGAAGGGCTTTTGTGTTTCAGAACAGAAGAAGGGATCATGTTGCTGATGAAGTTAG  
CAGAGTAGAAGGCCTCAACCCAATATTTAAGAGGAGTGTGACTTTGAAATAACATAGAAAGACCCAATTGAG  
TAAGATGTCTATGTTTTCTCTCAGCAATACCATTTTTGTGAGGAGTTGAAGGACATGAAACAAGATGAACAAT  
CCCTTGATCTCTGAGATGATTGCGAAACCTGTGCTCATAAACTCACCACCCCATCGCTCTGAAAGACTTTC  
AGTTTCTTGTTAACTGATTTTCGATTTGTTTTGAAAGACAATGAACACATCACAAAAATCAGACTTGGCTT  
TAAGAGGTATTATCCATGAGTAGCGACTAAAAGTTGTCAACAAAGACTGCATAATACTTGAACCTTGAAGTGA  
TACAACCGGAGAAGGACCCACAGATCACAATGTATCCGATCTATGGGTTCTTGACACTAGACTCTGAAATA  
AAAAAAGGAAGCTGACTGCTCTTTCCCATCTGGCAAGGTCCACAAACGGGAGAAATGCTGCTCTTATTGACT  
ATGATTGCCTTGCTTTGCTTGAGGAGCTGAAGAATCTGGAAGTTCGCGTGCCCAAGTCGCTGATGCCACACC  
ATATCACTAGCTGCACACTGACGATTGGAGAAGTAAGCCGCAAACCTCTTCTTCTCCAGCACATACAAGCCTC  
TATTTGAGTTCCCTTTGTCACCACCTTCTGAGCATCGAGGTCGATGACATAGACAGCATTAGAGTCAAAGAA  
CACCCACAGGGGTAATCATCACACAGTTTGGATACAGATAATAGTGATTTTGCATTGAAGGACAGACAAG  
AACATCGTTTAGAGGAAGGCTACCTGTCTCAGTGGTGAGCGTTGTGGAACCAACGTGGGTAATCGGAAGG  
AAATTGCCATCTGCCACCATAACATGCTCAGAACCATTGTATGGAGTAGTGTCTGCATCTGAGTTGTATTAGG  
AACCATGTGAGCAGTGGCACCTGAGTCAGCTATCCATTCCCTGCCACTAGGATCAGAGACTGGAAAAGCGG  
ACAGAGCATGAGGAACATCGTCACTCTGATAAGAGTTATCAAAGCGGTTCCAGCAACGAAGAGCGGAGTG  
GCCGGTGCGGCCACAGATCTGACACACAGGGCGAGAGTTGTTGTTGTTATTGCCACCACCAGAGTTGCTGA  
CTTGTTGAGTGAAACCTCTTCCACGAGTTGAGAAGCCACCACGACCAGAATAGCCACCGCGACCACGAGAA  
TAATTATTGCTTCGTCCTCTGTTGAGTTGTTGTAGTACCCTCGGTGAGTCTGGAAAGCCATGTTGGGAGTAA  
CATCTGATGTTGCTTCATACGACTGAAGACGAGCGTCAAAACCAGAGACATCAGAAATCACATCGTTCAAAG  
TCGGAGGAGGGATTGAGTCATGGAGCTCTGAACGACAGTGATAATTGGATCATATTCTTCCAAGGCCAT  
TGATAAATGAGAAGATCTTCATGGATTCTCTATAGGCTTCCAATGGAGCTCAACTTGTCACAAATGGCTCG  
AAACTCACGACAGTAGGTAGTAAAGTCTTTACCTTTCTTAGTCATCAACTGGAGAGACCGTCTGAGCTCAAA  
CTCACGAGCAATAGAACTCTTGTTGTAGTTGTCAGCTAACGATAACCAGACATCACGAGATGTAGATAGACCA  
TGTAAGTGTACCAAGGACTTCCTCAGTAAGTGTTCAAAGATCCAAGAAATGACGAGTTGATCCGTACAAGTC  
CAAGCTTCAAAGCGAGGATTTGGGGCTTGAACGTTGACGTTGTGACACCGGTTGTGACTAGCTCCGGCG  
GAGGTGGAATCTGACCAGTAGCAAAGCCCAACAGCTTCTGACTGCGAAGAAGAGACTCCATTTGAGTCTTC  
CATAGGAGATAGTTGCTGTCACTCAGTTTAATGGTAACAGAACTTGTAAATGTGAACACTGGTGGGAAAAGG  
GTATGGATCTTGCTCAGCCATGACAGCACCTGTTAGGGTTAAATGAGCTCTGATACCATGAGAACAAGAGGA  
GACAGAGAGAAATTTAATAAAACTTCCTTTGTATTCACTTTCTCAAAACGTTTCTTTACAAGATAATCGAGTA  
TATATAACCTCAAGATAAACCTAGTTCCCTTAACCTTTGGACCACTCAACACGTGTCTTCGTCACACACT  
CTACACCTTGCAAGGCATCGTAACGGCTAGACAAAGCTATTCCACAGTTTACTCCAGCTGGTGCAATTTGTCTT  
CTTGTTCTGTACTTGTACGAACCTTTCATTACTCTGTTTCAGAGTTTGTCTTTGGGCCAGCATACTTCCTTCAG  
TTAATGGACCAGTCGCTGATATACCAAGGCCCATCATGGCTTGTACTGTATCGGCGAGCTTTTGACGGG  
TCTAAAGGCGGTCTCTTCAGTGGGAGACGAGGCACAGAGTAGCCGTTGAAGCGGCGAAAGGACTGTGTT  
ATCTTCACCATGACTGTTGCGCGTTGATCTTGACAGAGACGTTAAGTCCAATAACATTCTCCTGGACTCTGAT  
TTCGAAGCCCATGTTGCTGATTTTGGGCTTGCTAAGTTCTTAGTGACGGTGCTGCTTCTGAGTGTATGCTCT  
CAATAGCTGGCTCTACGTTACATCGCTCCAGGTTAGTTTAAACGTGTTTTATATAACAACTATGCCATGTT  
CTTTAAATGTTACTGAGACTAATCATATGTTAGAGTTTGTGTCGTTTTATTGTCGTATAGCTGATTACTATGAT  
TTGTGACACACAAATGAATGTGACTTTAACAATAAAATATGTACTAATCATTGTTTGTGTTTGGGTTTGATAGA  
GTATGCATACACTCTCAAAGTAGACGAGAAGAGTGATGTGTATAGCTTTGGAGTGGTCTTGTGTTGGAGCTGAT  
AGCTGGGAAGAAACCGGTTGGTGAGTTTGGGGAAGGAGTGGATATAGTGAGGTGGGTGAGGAACACGGA  
GGGTGAGATACCTCAGCCTTCGGATGCAGCTACTGTTGTTGCGATCGTTGACCCGAGGTTGACTGGTTACCC  
GTTGACCAGTGTGATTCATGTGTTCAAGATAGCGATGATGTGTGTGGAGGATGAGGCCGCGTCAAGGCCTA

CGATGAGGGAAGTTGTGCACATGCTAACTAAGTCCGTGACTAACTTGATCGCCTTCTGAGTTCT  
GACCCAATCAAAGGCTAATGAAAAATAAGATTGTGTTGTGTGTAATGATAATTTTTGTTTTTAAAGTGA  
CATATATCGTTTTAAATTATTGCCGAGTTGTATGTATTTGCTGTGTGTTGGATCTGTATATCGCCTCTTATGTG  
TTTGTTATCTACTCTTAAGTCTGTAATGAGATTCTTATGCTTATTGATGATGGCTTTTAAATTTAGCTATTTCTT  
CTTTCAGACAAAAGTTGCGTAAGTAATGAAAAGAGATAAAAACCAAGAAGCATATGTTCAATACAAGCAGACT  
CATCATTTGTATTATCAACAAGAGCAGACAAACATGTGTCTTAGATCAAAGATGATGATGATGATCTGGAGCC  
AATCCAAATGAGATCCACTCCACTTTTTCTCTCACAAACAATTTCTCTGCTAGATTCTACCAATATCCAACCT  
GAAATCTAAATATAGATTCACATGTTTATTATGGTAATAGACCAAGATCCTCCATTACAATGTGGGATGTTCTC  
TCTACACCAACAAGCCCATACAAATTACACTCAAATCCTTTAACACAGCTCTTAAATTCAAAATCATTTTTATC  
AAAAAAAAAAAAACAAGAACATTATTCATCATCGCTATAACACTAAAAAAGAAACACAGACATAATTTTCAT  
AGCTACAATAAATAACCAATGACTAATTCCTCAATAGCTGTTATATACTTAGAAAGCACCGTAAGGTATGTG  
TTGAGGAAGCGTGAATCGAACCTGCGAAGCTGGTAACCGAACCGCAACGCCGTGCCAGCAAATCCCTCCTT  
TACAAATTCACCACCTTGGTGATGCTGAAGGTGACTAAGATTCTCAACGCCTACGCGATTGTACCGCGAAA  
CCGCATCCGCCGCCCTGCGAGTCACGTCCCAAGCCAGCGTGACCGCAAGCAAACTCCGACCGTCGTAATC  
GAAACTACAACGACGAATCCA

**Supplementary data 4:** cDNA length of bilocular (2964 bp including 2611 bp exon1 and 353 bp exon 2)

ATGGAGATGAGACTTTTGAAAACACACCTTCTGTTTCTGCATCTTCACTACGTTATCTCGATTTTGCTTCTATG  
TTTCTACCATGCTTCGCTTCCACTGACATGGACCATCTCCTCAACCTCAAATCCTCAATGACTGGTCACAACG  
GACACGGTCTCCAGACTGGGTTCACTCCACTTCTCCCACGGCTCACTGTTCTTCTCCGGCGTCTCATGCGA  
CGCCGACGCTCGTGTGTCTCACTCAACGTCTCTTCACTCCTCTGTTGGAACCATCTCACCGGAGATTGGG  
ATGCTGAACCGTTTGGTGAATCTGACGTTAGCCGCGAATAACTTCTCCGGTAGGTTGCCGCTGGAGATGAAG  
AGTCTCACTTCACTAAAGGTTCTCAACATCTCCAACAACGTAAACCTCAACGGAACCTTCCCCGGAGAGATT  
CTCACTTCCATGGTCGACCTCGAAGTCTCGACGCCTATAACAACAACCTCACTGGGCCGTTACCGCCGGAG  
ATCCCCGGGCTGAACAAGCTCAAACACCTCTCTCTCGGAGGAACTTCTTACCGGAGAGATTCCCGAGAG  
TTACGGAGATATCCAAAGCTTGGAGTATCTCGGCCTAACGGAGCCGACTCTCCGGCGAATCTCCGGCGTT  
CTTGTCACGTCTCAAGAATCTCAGAGAAATGTACGTGCGCTACTTCAACAGCTACACCGGCGGCGTTCCGCC  
GGAGTTCCGGCGAATTAACGAAGCTAGAAATCCTCGACATGGCGAGCTGTACTCTCACCGGAGAGATTCCGA  
CGACACTGAGTAATCTGAAACACTTGACACGCTGTTCTCCACATCAACAACCTTAACCGGAAACATCCCAC  
CAGAACTCTCCGGTTTAATCAGCTTAAATCTCTCGATCTATCAATTAACCAGCTAACCGGAGAGATTCTCA  
GAGCTTCATCTCTCTGGGAAACATCACTCTCATCAACCTCTTCAAGAAACAACCTCCACGGGCCGATACCGGA  
GTTTCATCGGAGAAATGCCGAACCTCCAAGTCTTCAGGTGTGGGAGAACTTACGTTAGAGTTACCGG  
CGAATATCGGCCGGAACGGGAATCTGAAAAGCTCGACGTCTCTGAAAACCATCTCACCGACTCATCCCCG  
TGGATTTATGCAGAGGTGGGAAGCTGGAGGTTCTGGTACTCTCAACAACCTTCTTCTCGGCTCCATCCCCG  
AGAAGCTAGGTCAATGCAAATCTCTAAACAAGATCAGAATCGTCAAGAATCTCCTCAACGGGACCGTTCCGG  
CGGGACTATTCAACTTACCACTCGTTACAATCATCGAGCTCGCGGATAACTTCTTCTCCGGGGAACCTCCTAC  
GGAGATGTCCGGCGACGTTCTCGATCATATCTACCTATCTAACAACCTGGTTTACCGGTTTAATCCCTCCGGCTA  
TCGGTAATTTCAAAAATCTACAGGATCTGTTCTTAGACCGGAACCGGTTTAGCGGGAATATTCCGAGAGAAG  
TTTTCGAGCTGAAGCATCTCACGAAGATCAACACGAGCGCTAACAACCTAACCGGCGATATCCCTGACTCAT  
TCTCGCGATGCACTTCTTAATCTCCGTGATCTCAGCCGTAACAGAATCGGCGGAGATATCCCGAAAGACAT  
CCACGACGTGATTAACCTTAGGAACCTCTCAATCTCTCCGGGAATCAGCTCACCGGCTCGATCCCGATCGGAATC  
GGGAAGATGACGAGCTTAACCACTCTCGATCTCTCTTCAACGACCTCTCCGGGAGAGTACCACTCGGCGG  
TCAGTTCCTAGTCTTCAACGACACTTCTTCGCCGGAACCTTACCTCTGCCTCCCTACCACGCTCCTGCTG



CTAACGCGTCCAGGACAAACCTCTGATCGCATCCACGCGGCGCTGTTCTCTCCGTCGAGGATCGTCATCACG  
ATCATCGCGGCGATCACGGCGTTGATCCTCATCAGCGTCGCGATCCGTCAGATGAACAAGAAGAAACACGA  
GAGATCCCTCTCGTGGAAGCTAACCGCCTTCCAGCGACTCGATTTCAGGCGGAAGACGTCCTCGAGTGCC  
TTCAAGAAGAGAACATAATCGGCAAAGGCGGAGCGGGGATCGTCTACCGCGGATCCATGCCGAACAACGT  
AGACGTCGCGATCAAACGGTTAGTTGGACGCGGAACGGGGAGGAGCGATCACGGATTACGGCGGAGAT  
TCAGACGTTAGGAAGAATCCGCCACCGTCATATAGTGAGACTACTCGGATACGTGGCGAACAAGGACACGA  
ACCTGCTTCTCTACGAGTACATGCCTAACGGGAGCCTCGGCGAGCTTTGCACGGGTCTAAAGGCGGTCATC  
TTCAGTGGGAGACGAGGCACAGAGTAGCCGTTGAAGCGGCGAAAGGACTGTGTTATCTTCACCATGACTG  
TTCGCCGTTGATCTTGACAGAGACGTTAAGTCCAATAACATTCTCCTGGACTCTGATTTCAAGCCCATGTT  
GCTGATTTTGGGCTTGCTAAGTTCTTAGTGGACGGTGCTGCTTCTGAGTGTATGCTCTCAATAGCTGGCTCCT  
ACGTTACATCGCTCCAGAGTATGCATACACTCTCAAAGTAGACGAGAAGAGTGATGTGTATAGCTTTGGAG  
TGGTCTTGTGGAGCTGATAGCTGGGAAGAAACCGTTGGTGAGTTTGGGAAGGAGTGATATAGTGAG  
GTGGGTGAGGAACACGGAGGGTGAGATACCTCAGCCTTCGGATGCAGCTACTGTTGTTGCGATCGTTGACC  
CGAGGTTGACTGGTTACCCGTTGACCAGTGTGATTCATGTGTTCAAGATAGCGATGATGTGTGTGGAGGATG  
AGGCCGCGTCAAGGCCTACGATGAGGGAAGTTGTGCACATGCTAACTAACTCTCCTAAGTCCGTGACTAACT  
TGATCGCCTTCTGA

**Supplementary data 5: cDNA length of multilocular (2349 bp)**

ATGGAGATGAGACTTTTGAAAACACACCTTCTGTTTCTGCATCTTCACTACGTTATCTCGATTTTGCTTCTATG  
TTTCTACCATGCTTCGCTTCCACTGACATGGACCATCTCCTCAACCTCAAATCCTCAATGACTGGTCACAACG  
GACACGGTCTCCAGACTGGGTTCACTCCACTTCTCCCACGGCTCACTGTTCTTCTCCGGCGTCTCATGCGA  
CGCCGACGCTCGTGTGTCTCACTCAACGTCTCTTCACTCCTCTGTTGGAACCATCTCACCGGAGATTGGG  
ATGCTGAACCGTTTGGTGAATCTGACGTTAGCCGCGAATAACTTCTCCGGTAGGTTGCCGCTGGAGATGAAG  
AGTCTCACTTCACTAAAGGTTCTCAACATCTCCAACAACGTAAACCTCAACGGAACCTTCCCCGGAGAGATT  
CTCACTTCCATGGTCGACCTCGAAGTCTCGACGCCTATAACAACAACCTCACTGGGCCGTTACCGCCGGAG  
ATTCCCCGGGCTGAACAAGCTCAAACACCTCTCTCTCGGAGGAACTTCTTACCGGAGAGATTCCCGAGAG  
TTACGGAGATATCCAAAGCTTGAGATATCTCGGCCTAACGGAGCCGACTCTCCGGCGAATCTCCGGCGTT  
CTTGTCACGTCTCAAGAATCTCAGAGAAATGTACGTCGGCTACTTCAACAGCTACACCGCGGCGTTCGCC  
GGAGTTCCGGCGAATTAACGAAGCTAGAAATCCTCGACATGGCGAGCTGTACTCTCACCGGAGAGATTCCGA  
CGACACTGAGTAATCTGAAACACTTGACACGCTGTTCTCCACATCAACAACCTTAACCGGAAACATCCCAC  
CAGAACTCTCCGGTTAATCAGCTTAAATCTCTCGATCTATCAATTAACCAGCTAACCGGAGAGATTCTCA  
GAGCTTCATCTCTCTGGGAAACATCACTCTCATCAACCTCTTCAGAAACAACCTCCACGGGCCGATACCGGA  
GTTTCATCGGAGAAATGCCGAACCTCCAAGTCTTCAGGTGTGGGAGAACAACCTTACGTTAGAGTTACCGG  
CGAATATCGGCCGGAACGGGAATCTGAAAAAGCTCGACGTCTCTGAAAACCATCTCACCGACTCATCCCCG  
TGGATTTATGCAGAGGTGGGAAGCTGGAGGTTCTGGTACTCTCAACAACCTTCTTCTCGGCTCCATCCCCG  
AGAAGCTAGGTCAATGCAAATCTCTAAACAAGATCAGAATCGTCAAGAATCTCCTCAACGGGACCGTTCCGG  
CGGGACTATTCAACTTACCACTCGTTACAATCATCGAGCTCGCGGATAACTTCTTCTCCGGGGAACCTCCTAC  
GGAGATGTCCGGCGACGTTCTCGATCATATCTACCTATCTAAACAACCTGGTTTACCGGTTAATCCCTCCGGCTA  
TCGGTAATTTCAAAAATCTACAGGATCTGTTCTTAGACCGGAACCGGTTTAGCGGGAATATTCCGAGAGAAG  
TTTTCGAGCTGAAGCATCTCACGAAGATCAACACGAGCGCTAACAACCTAACCGGCGATATCCCTGACTCAT  
TCTCGCGATGCACTTCTTAATCTCCGTCGATCTCAGCCGTAACAGAATCGGCGGAGATATCCCGAAAGACAT  
CCACGACGTGATTAACCTAGGAACCTCTCAATCTCTCCGGGAATCAGCTCACCGGCTCGATCCCGATCGGAATC  
GGGAAGATGACGAGCTTAACCACTCTCGATCTCTCTTCAACGACCTCTCCGGGAGAGTACCACTCGGCGG  
TCAGTTCCTAGTCTTCAACGACACTTCTTCGCCGGAACCCCTTACCTCTGCCTCCCTACCACGCCTCCTGC

CTAACGCGTCCAGGACAAACCTCTGATCGCATCCACGCGGCGCTGTTCTCTCCGTCGAGGATCGTCATCACG  
ATCATCGCGGCGATCACGGCGTTGATCCTCATCAGCGTCGCGATCCGTCAGATGAACAAGAAGAAACACGA  
GAGATCCCTCTCGTGGAAGCTAACCGCCTTCCAGCGACTCGATTCAAGGCGGAAGACGTCCTCGAGTGCC  
TTCAAGAAGAGAACATAATCGGCAAAGGCGGAGCGGGGATCGTCTACCGCGGATCCATGCCGAACAACGT  
AGACGTCGCGATCAAACGGTTAGTTGGACGCGGAACGGGGAGGAGCGATCACGGATTACGGCGGAGAT  
TCAGACGTTAGGAAGAATCCGCCACCGTCATATAGTGAGACTACTCGGATACGTGGCGAACAAGGACACGA  
ACCTGCTTCTCTACGAGTACATGCCTAACGGGAGCCTCGGCTGA
